# Supplementary material for: Cyclodextrin-assisted synthesis of tailored mesoporous silica nanoparticles
Source: publisher site journal article supplement (doi:10.3762/bjnano.9.64), 2018-02-22
Supplement: Additional file 1 [file 2190-4286-9-64-S1.pdf]

# Supporting Information

for

## **Cyclodextrin-assisted synthesis of tailored mesoporous silica nanoparticles**

Fuat Topuz\*<sup>1,2</sup> and Tamer Uyar\*<sup>§1,3</sup>

Address: <sup>1</sup>UNAM-National Nanotechnology Research Center, Bilkent University, 06800 Ankara, Turkey; <sup>2</sup>Faculty of Engineering and Natural Sciences, Sabanci University, 34956 Istanbul, Turkey and <sup>3</sup>Institute of Materials Science and Nanotechnology, Bilkent University, 06800 Ankara, Turkey

Email: Fuat Topuz\* - fuat.topuz@rwth-aachen.de;  
Tamer Uyar\* - tamer@unam.bilkent.edu.tr

\* Corresponding author

§ Phone: +90 (312) 290 8987

### **Additional experimental data**

**Table S1:** The composition and characteristics of the MSNs.

| Sample Code | CD-Type      | CD<br>(% (w/v)) | TEOS<br>(% (v/v)) | $r_{\text{CD/CTAC}}$<br>(w/w) | NaOH<br>2M (mL) | Water<br>(mL) | Synthesis<br>Temp (°C) | Particle<br>Shape <sup>a</sup> | Particle<br>(nm) <sup>b</sup> |
|-------------|--------------|-----------------|-------------------|-------------------------------|-----------------|---------------|------------------------|--------------------------------|-------------------------------|
| MSN-1       | $\beta$      | 0.50            | 1                 | 5                             | 0.7             | 96            | 80                     | Spherical -<br>Ellipsoid       | 351                           |
| MSN-2       | $\beta$      | 1               | 1                 | 10                            | 0.7             | 96            | 80                     | Spherical                      | 750                           |
| MSN-3       | HP- $\gamma$ | 0.25            | 1                 | 1.25                          | 0.7             | 96            | 80                     | Faceted                        | 825                           |
| MSN-4       | $\beta$      | 0.25            | 1                 | 2.50                          | 0.7             | 96            | 80                     | Spherical                      | 273                           |
| MSN-5       | HP- $\beta$  | 0.25            | 1                 | 2.50                          | 0.7             | 96            | 80                     | Faceted                        | 1290                          |
| MSN-6       | HP- $\gamma$ | 0.10            | 1                 | 0.50                          | 0.7             | 96            | 80                     | Spherical-<br>Faceted          | 139                           |
| MSN-7       | HP- $\gamma$ | 0.17            | 1                 | 0.85                          | 0.7             | 96            | 80                     | Spherical-<br>Faceted          | 210                           |
| MSN-8       | HP- $\gamma$ | 0.40            | 1                 | 2                             | 0.7             | 96            | 80                     | Spherical                      | 206                           |
| MSN-9       | HP- $\gamma$ | 0.60            | 1                 | 3                             | 0.7             | 96            | 80                     | Spherical                      | 207                           |
| MSN-10      | HP- $\gamma$ | 0.10            | 1                 | 0.25                          | 0.7             | 96            | 80                     | Spherical                      | 83                            |
| MSN-11      | HP- $\gamma$ | 0.17            | 1                 | 0.42                          | 0.7             | 96            | 80                     | Spherical                      | 85                            |
| MSN-12      | HP- $\gamma$ | 0.60            | 1                 | 1.50                          | 0.7             | 96            | 80                     | Spherical                      | 95                            |
| MSN-13      | $\beta$      | 0.25            | 1                 | 1.25                          | 0.7             | 96            | 80                     | Spherical                      | 112                           |

|        |         |      |   |      |     |    |    |                             |      |
|--------|---------|------|---|------|-----|----|----|-----------------------------|------|
| MSN-14 | $\beta$ | 0.75 | 1 | 3.75 | 0.7 | 96 | 80 | Spherical                   | 125  |
| MSN-15 | $\beta$ | 1.5  | 1 | 7.50 | 0.7 | 96 | 80 | Bean-like                   | 484  |
| MSN-16 | $\beta$ | 1    | 1 | 10   | 0.7 | 96 | 80 | Spherical<br>(linked)       | 1542 |
| MSN-17 | $\beta$ | 1    | 1 | 2.50 | 0.7 | 96 | 80 | Spherical<br>(monodisperse) | 167  |
| MSN-18 | $\beta$ | 1    | 1 | 1.66 | 0.7 | 96 | 80 | Spherical<br>(linked)       | 130  |
| MSN-19 | $\beta$ | 1    | 1 | 1.25 | 0.7 | 96 | 80 | Spherical<br>(linked)       | 110  |
| MSN-20 | —       | —    | 1 | 0    | 0.7 | 96 | 80 | Spherical-<br>Ellipsoid     | 185  |

<sup>a</sup>The particle shape was evaluated through SEM or TEM analysis. <sup>b</sup>Particle size was determined through SEM or TEM images over single particles.

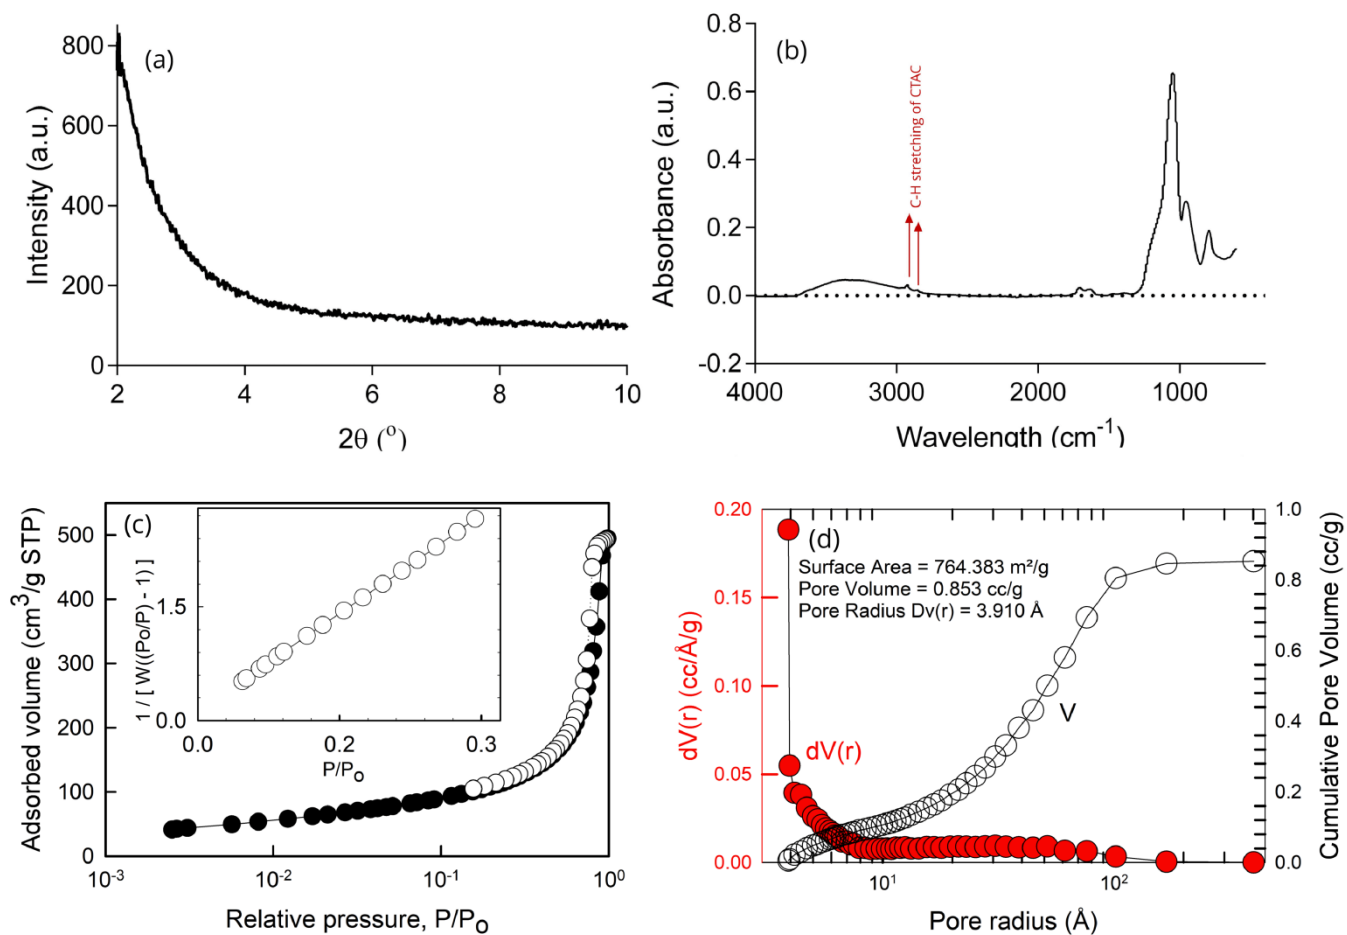

**Figure S1:** (a) XRD pattern and (b) FTIR spectrum of MSN-3.  $c_{\text{HP-}\gamma\text{-CD}} = 0.25\%$  (w/v) and  $r_{\text{CD}/\text{CTAC}} = 1.25$ . (c) The nitrogen adsorption–desorption isotherms and (d) BJH pore-size distribution of MSN-3. Inset shows the multi-point BET plot.

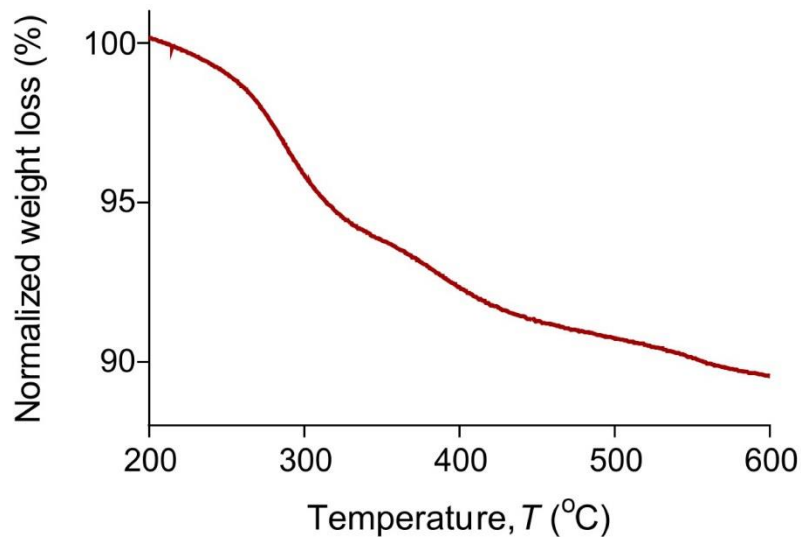

**Figure S2:** TGA of MSN sample produced at 0.25% (w/v) of HP- $\gamma$ -CD (MSN-3).  $c_{CD} = 0.25\%$  (w/v),  $r_{(CD/CTAC)} = 1.25$  and  $T = 80$  °C.

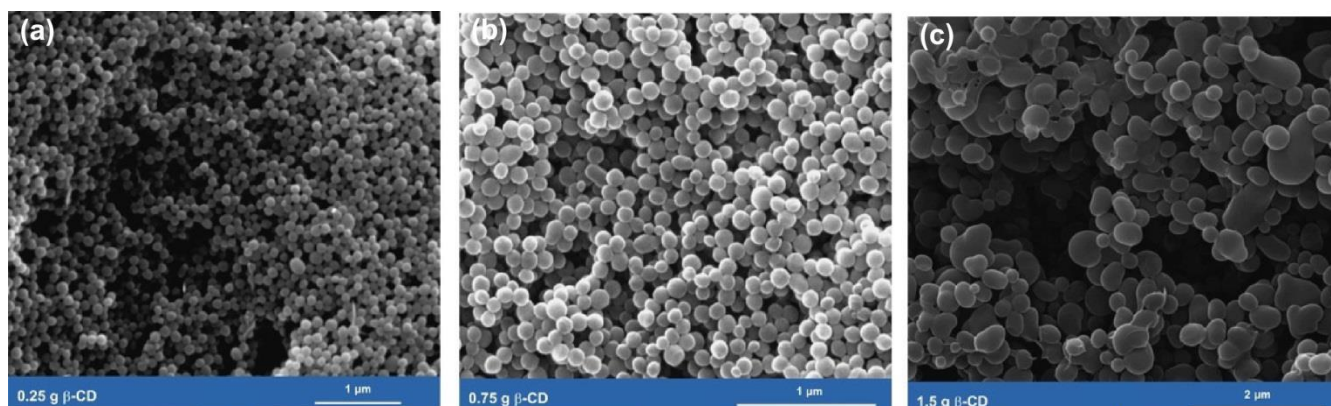

**Figure S3:** SEM images of the nanoparticles produced at various  $\beta$ -CD concentrations; MSN-13 ( $c_{\beta\text{-CD}} = 0.25\%$  (w/v) and  $r_{CD/CTAC} = 1.25$ ) (a), MSN-14 ( $c_{\beta\text{-CD}} = 0.75\%$  (w/v) and  $r_{CD/CTAC} = 3.75$ ) (b) and MSN-15 ( $c_{\beta\text{-CD}} = 1.5\%$  (w/v) and  $r_{CD/CTAC} = 7.50$ ) (c).

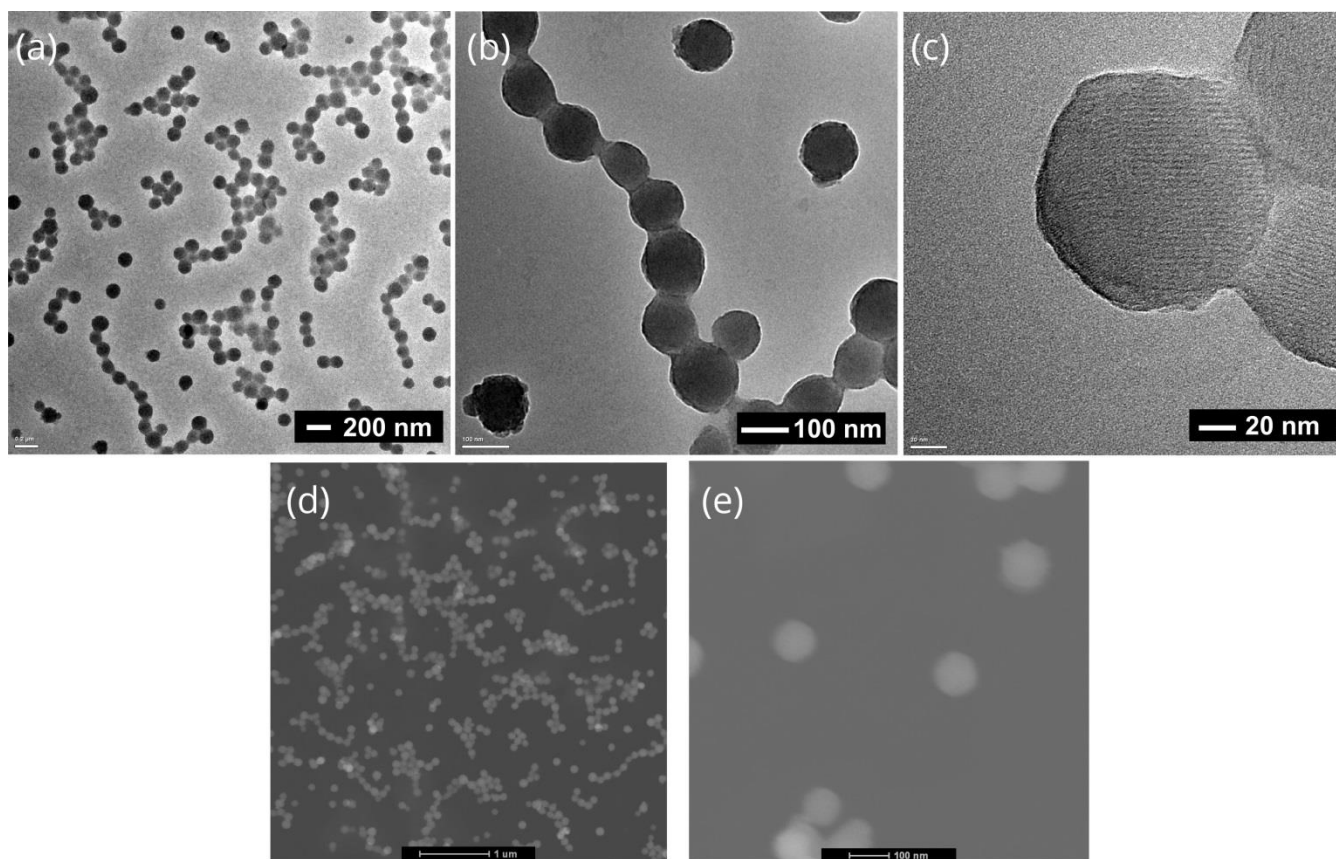

**Figure S4:** TEM (a–c) and STEM (d, e) images of MSNs (MSN-13).  $c_{\beta\text{-CD}} = 0.25\%$  (w/v) and  $r_{\text{CD}/\text{CTAC}} = 1.25$ .

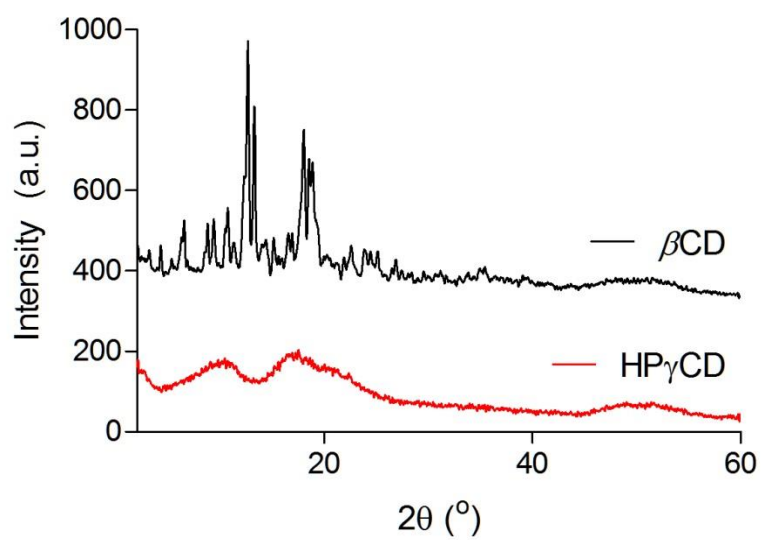

**Figure S5:** XRD patterns of as-received  $\beta\text{-CD}$  and  $\text{HP-}\gamma\text{-CD}$ .

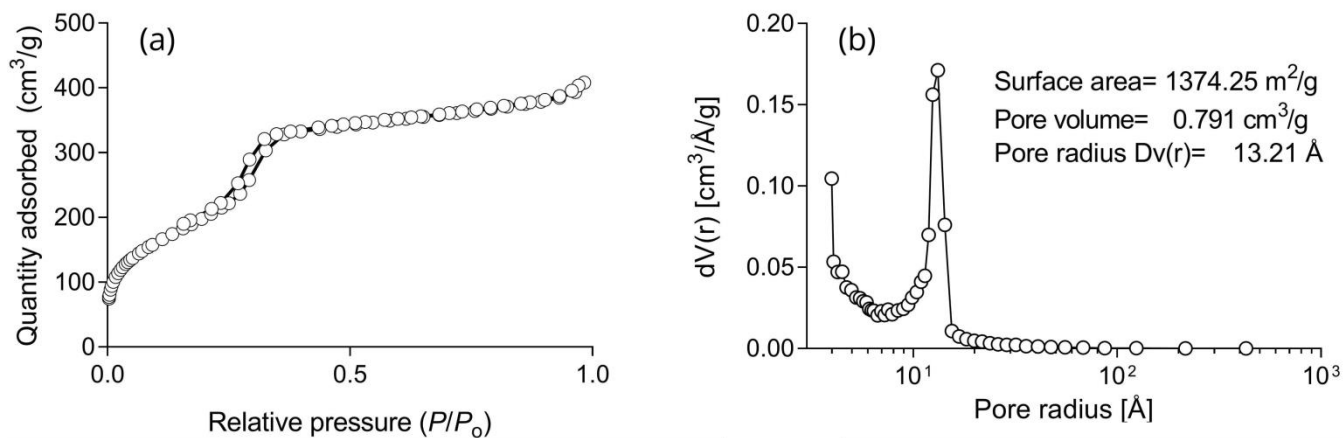

**Figure S6:** BET analyses for MSNs. (a) Nitrogen adsorption–desorption isotherm measured at 77 K and (b) BJH pore size analysis of the pristine MSNs (0.2% (w/v) CTAC) (MSN-20).

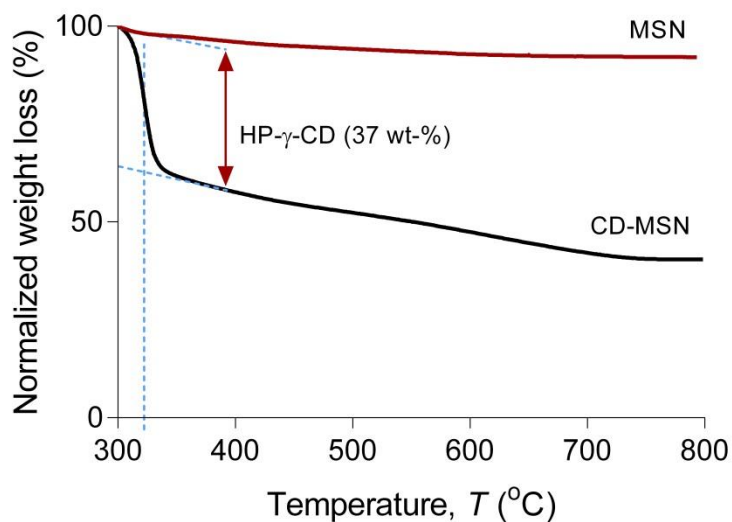

**Figure S7:** TGA curves of MSNs (MSN-9 and MSN-20) prepared in the presence and absence of CD. The dotted line corresponds to the burning of the embedded CD.  $c_{\text{CTAC}} = 0.2\%$  (w/v) and  $c_{\text{HP-}\gamma\text{-CD}} = 0.6\%$  (w/v).

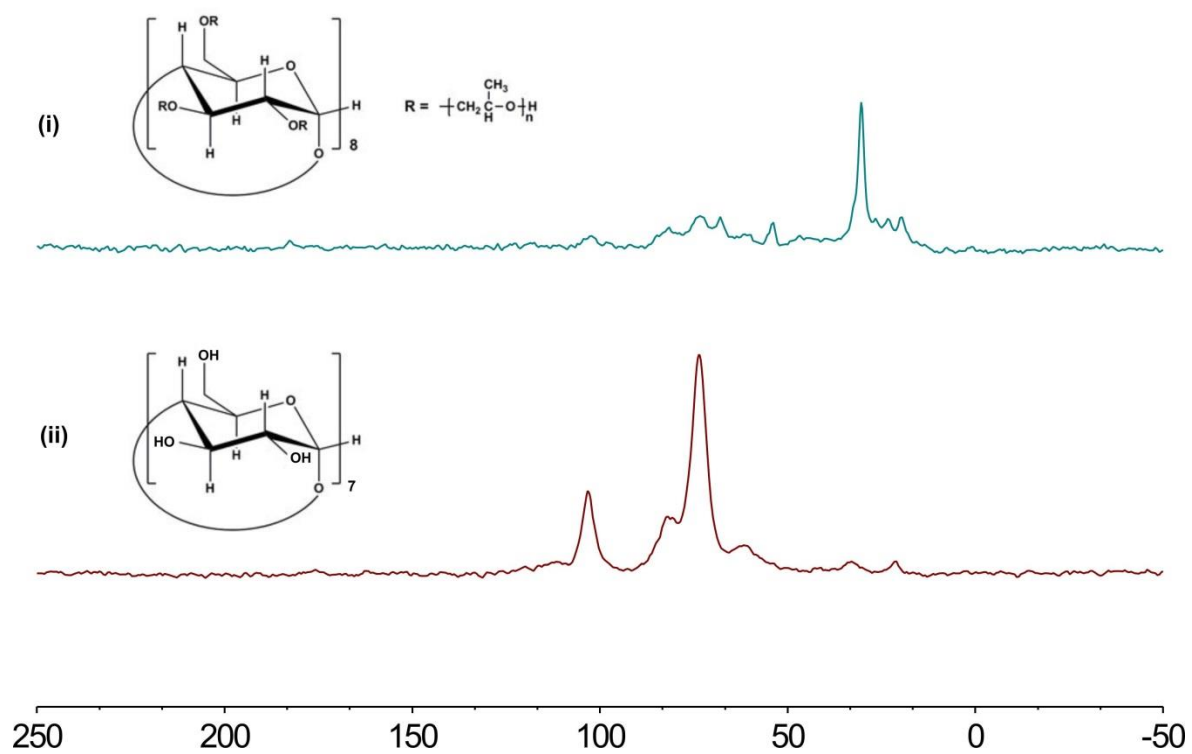

**Figure S8:** Solid-state  $^{13}\text{C}$  NMR spectra of MSNs; (i)  $c_{\text{HP-}\gamma\text{-CD}} = 0.25\%$  (w/v) (MSN-3) and (ii)  $c_{\beta\text{-CD}} = 1.5\%$  (w/v) (MSN-15).
